# Supplementary material for: Stroke‐Heart Syndrome: Does Sex Matter?
Source: PubMed Central journal article supplement — J Am Heart Assoc. 2023 Oct 18;12(21):e029799. doi: 10.1161/JAHA.123.029799 (PMC10727394; doi:10.1161/jaha.123.029799), 2023-10-18
Supplement: JAH3-12-e029799-s001.pdf [file JAH3-12-e029799-s001.pdf]

# **SUPPLEMENTAL MATERIAL**

**Table S1. Any cardiac event.**

|                                             | <b>Women</b>   | <b>Men</b>     |                 |
|---------------------------------------------|----------------|----------------|-----------------|
|                                             | <b>(n=160)</b> | <b>(n=140)</b> | <b>P value</b>  |
| <b>Acute myocardial infarction</b>          | 37 (23%)       | 24 (17%)       | 0.2             |
| Type 1*                                     | 5 (3%)         | 2 (1%)         | 0.4             |
| Type 2                                      | 25 (16%)       | 17 (12%)       | 0.4             |
| Type 3*                                     | 4 (3%)         | 4 (3%)         | 1               |
| <b>Acute non-ischemic myocardial injury</b> | 47 (29%)       | 30 (21%)       | 0.1             |
| Cardiomyopathy*                             | 4 (3%)         | 4 (2%)         | 1               |
| Takotsubo*                                  | 5 (3%)         | 1 (1%)         | 0.2             |
| AF with RVR*                                | 6 (4%)         | 1 (1%)         | 0.1             |
| Acute Heart Failure*                        | 3 (2%)         | 0              | 0.2             |
| Isolated dynamic cTn                        | 28 (18%)       | 23 (16%)       | 0.5             |
| <b>Ejection fraction</b>                    |                |                |                 |
| Preserved ( $\geq 50\%$ )                   | 106/145 (73%)  | 78/134 (58%)   |                 |
| Mildly (41-49%)                             | 8/145 (6%)     | 22/134 (17%)   |                 |
| Reduced ( $\leq 40\%$ )                     | 31/145 (21%)   | 34/134 (25%)   | <b>&lt;0.01</b> |
| <b>ECG patterns</b>                         |                |                |                 |
| STEMI                                       | 31 (20%)       | 19 (14%)       | 0.2             |
| NSTEMI*                                     | 2 (1%)         | 1 (1%)         | 1               |

Categorical variables are presented as frequency (column percent).

STEMI: ST-Elevation Myocardial Infarction, NSTEMI: non ST-Elevation Myocardial Infarction, AF: atrial fibrillation, RVR: rapid ventricular rhythm, cTn: cardiac troponin, AIS: acute ischemic stroke, STEMI: ST-elevation myocardial infarction; NSTEMI: non ST-elevation myocardial infarction.

\* P values were calculated using Fisher exact test.

**Table S2. Advanced cardiac testing performed in our AIS cohort.**

| <b>SEX</b> | <b>AGE</b> | <b>CARDIAC DIAGNOSIS</b> | <b>ADVANCED CARDIAC TESTING</b>                                                                                | <b>7-day MORTALITY</b> | <b>DISCHARGE DISPOSITION</b> |
|------------|------------|--------------------------|----------------------------------------------------------------------------------------------------------------|------------------------|------------------------------|
| F          | 76         | Type 2                   | Non-obstructive CAD at coronary angiography                                                                    | No                     | Home                         |
| F          | 83         | Type 2                   | Non-obstructive CAD at coronary CTA<br>Normal coronary angiography                                             | No                     | Skilled Nurse Facility       |
| F          | 76         | Type 2                   | Non-obstructive CAD at coronary angiography                                                                    | No                     | Home                         |
| F          | 70         | Takotsubo                | Normal coronary angiography                                                                                    | Yes                    | Death                        |
| F          | 69         | Non ischemic CMP         | Normal coronary angiography                                                                                    | No                     | Home                         |
| F          | 66         | Non ischemic CMP         | Normal coronary angiography                                                                                    | No                     | Home                         |
| F          | 76         | Type 2                   | Normal coronary angiography                                                                                    | No                     | Skilled Nurse Facility       |
| F          | 59         | Takotsubo                | Normal PET stress                                                                                              | No                     | Acute rehab                  |
| F          | 60         | Type 2                   | Normal exercise SPECT                                                                                          | No                     | Home                         |
| F          | 73         | Non ischemic CMP         | Normal nuclear stress test                                                                                     | No                     | Acute rehab                  |
| F          | 56         | Type 1                   | Positive coronary angiography: mid LAD 90% stenosis                                                            | No                     | Home                         |
| F          | 88         | Type 2                   | Non-obstructive CAD at coronary angiography                                                                    | No                     | Skilled Nurse Facility       |
| M          | 83         | Type 2                   | Normal coronary angiography                                                                                    | No                     | Death                        |
| M          | 81         | Type 2                   | Non-obstructive CAD at coronary angiography                                                                    | No                     | Home                         |
| M          | 41         | Non ischemic CMP         | Normal coronary angiography                                                                                    | No                     | Home                         |
| M          | 53         | Type 1                   | PET stress with large reversible defect of RCA and LAD<br>Positive coronary angiography (performed outpatient) | No                     | Acute rehab                  |
| M          | 72         | Type 2                   | Normal dobutamine stress echo                                                                                  | No                     | Home                         |
| M          | 57         | Type 1                   | Positive coronary angiography: left circumflex artery occlusion                                                | No                     | Home                         |
| M          | 55         | Type 2                   | Normal nuclear stress test                                                                                     | No                     | Home                         |

CAD: coronary artery disease, CTA: computed tomography angiography, CMP:

cardiomyopathy, PET: positron emission tomography, SPECT: single-photon emission

computerized tomography, LAD: left anterior descending artery, RCA: right coronary artery.
